# Supplementary material for: A facile approach to prepare Ni, Co, and Fe nanoarrays inside a native porous alumina template via a redox reaction
Source: Royal Society of Chemistry journal article supplement (doi:10.1039/c2ra00915c), 2012-01-01
Supplement: c2ra00915c.pdf [file c2ra00915c.pdf]

## Supplementary Information

The phase of the nanowires obtained by dissolving AAO templates and Al substrates was characterized by X-ray ( $\text{CuK}\alpha$ ) powder diffraction (XRD). As shown in Figure 1, all the peaks can be indexed to a face-centered cubic Fe (JCPDS card No. 89-4184 space group  $\text{Im}\bar{3}\text{m}$ ).

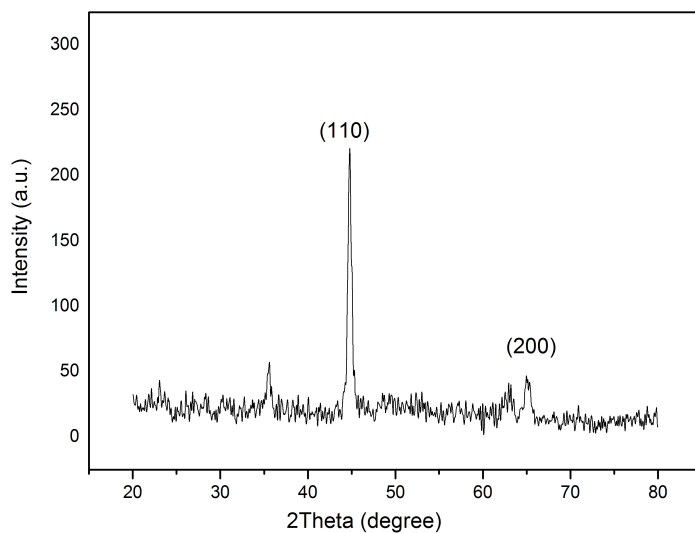

**Fig.1** XRD pattern of Fe nanowires collected after dissolving AAO templates

The phase of the nanowires obtained by dissolving AAO templates and Al substrates was characterized by X-ray ( $\text{CuK}\alpha$ ) powder diffraction (XRD). As shown in Figure 2, all the peaks can be indexed to a face-centered cubic Fe (JCPDS card No. 89-4308 space group  $\text{P6}_3/\text{mmc}$ ).

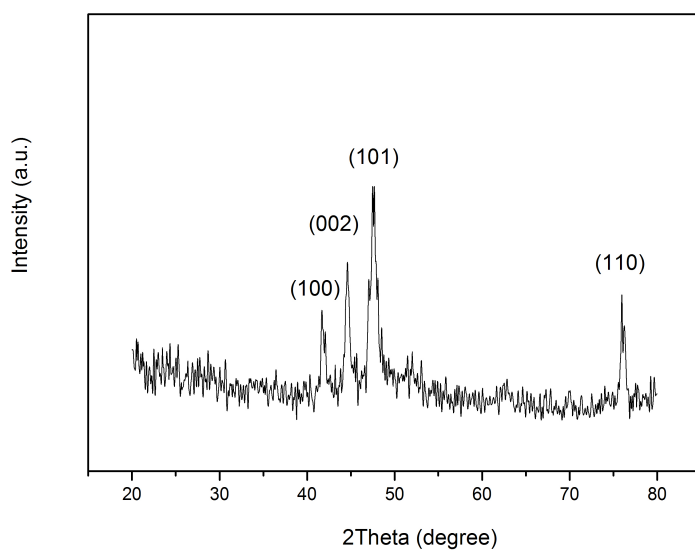

**Fig.2** XRD pattern of Co nanowires collected after dissolving AAO templates

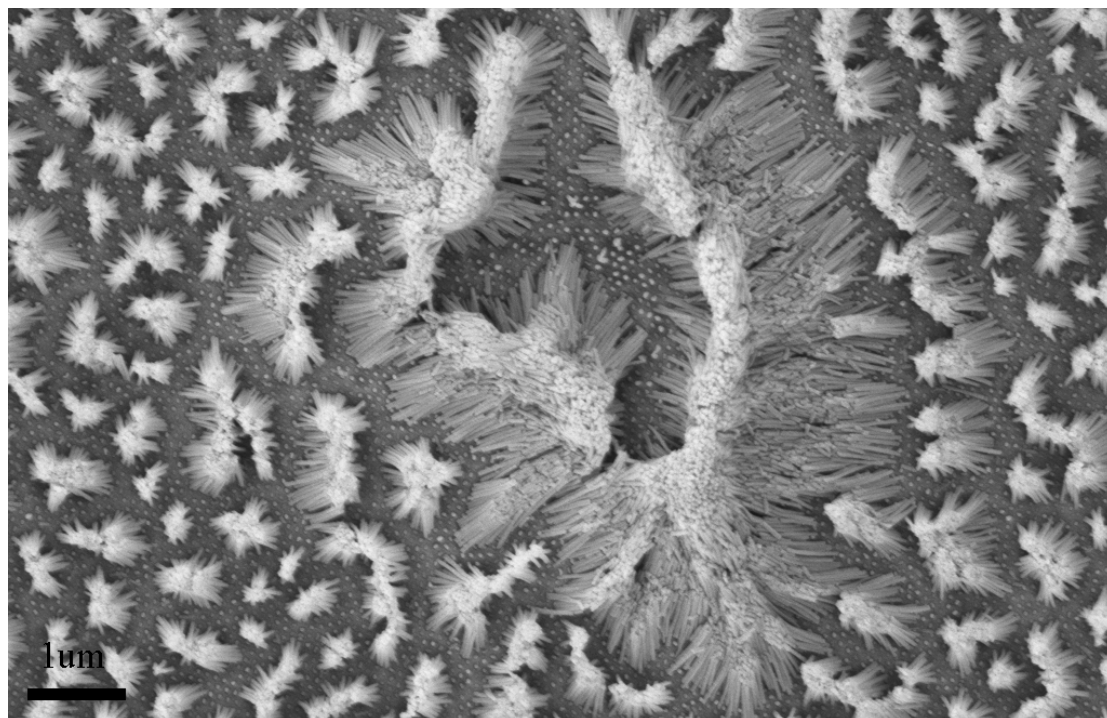

**Fig.3** The FESEM image of the Ni nanoarrays without any disposal

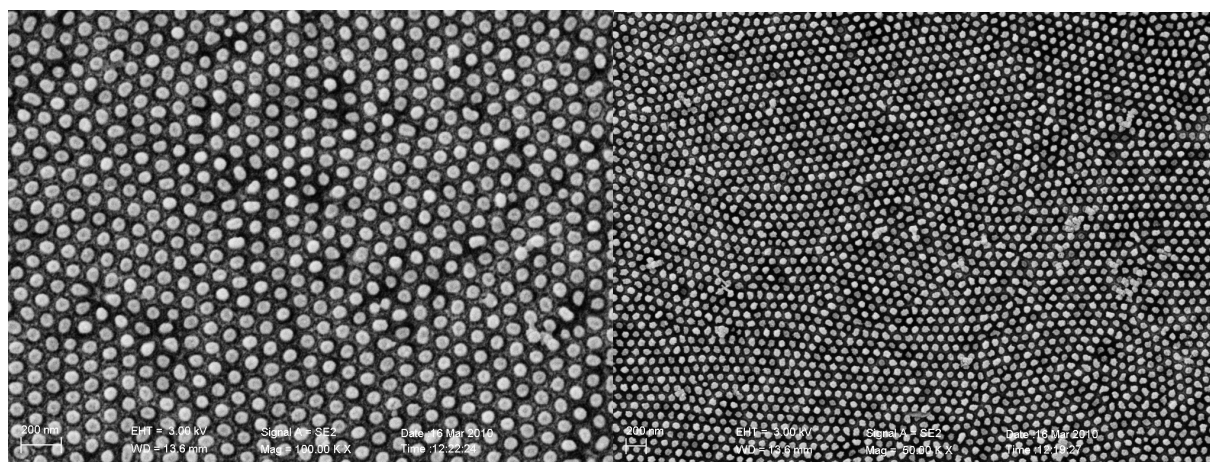

**Fig. 4** The FESEM image of the Ni nanoarrays with chromic acid disposal
